# Supplementary material
Source: PubMed Central journal article supplement (PMC4840178)
Supplement: NIHMS774066-supplement-Supp_Table_S1.pdf [file NIHMS774066-supplement-Supp_Table_S1.pdf]

## Supplementary Table S1

RNA probes were generated from plasmids containing gene fragments for *Notch1*,<sup>(13)</sup> *Notch2*,<sup>(13)</sup> *Jag1*,<sup>(14)</sup> and *Jag2*.<sup>(14,15)</sup> Details of the RNA probes are as follows:

### *Notch1*:

RNA probes were generated from the mouse *Notch1* gene (accession no. NM\_008714.3) fragment spanning nucleotide positions 3721-4767. The 1046bp fragment was cloned into the HindIII and BamHI restriction endonuclease sites in pBluescript KS (+). To generate antisense probes, we linearized with HindIII and transcribed with T7 RNA polymerase.

### *Notch2*:

RNA probes were generated from the mouse *Notch2* gene (accession no. NM\_010928.2) fragment spanning nucleotide positions 49-1062. The 1012bp fragment was cloned into the BamHI and HindIII sites in pBluescript KS (+). To generate antisense probes, we linearized with BamHI and transcribed with T3 RNA polymerase.

### *Jag1*:

RNA probes were generated from the rat *Jag1* gene (accession no. NM\_019147) fragment spanning nucleotide positions 387-1036. The 6496bp fragment was cloned into the KpnI and XhoI I and BamHI restriction endonuclease sites in pBluescript SKII (-). To generate antisense probes, we linearized with XhoI and transcribed with T3 RNA polymerase.

### *Jag2*:

RNA probes were generated from the mouse *Jag2* gene (accession no. AF\_038572.1) fragment spanning nucleotides positions 768-1789. The 1021bp fragment was cloned into the EcoRI and BamHI sites in pBluescript SK (+). To generate antisense probes, we linearized with EcoRI and transcribed with T3 RNA polymerase.
